# Supplementary material for: Trends in worldwide research on cardiac fibrosis over the period 1989–2022: a bibliometric study
Source: PubMed Central journal article supplement (PMC10277498; doi:10.3389/fcvm.2023.1182606), 2023-06-05
Supplement: Image2.pdf [file Image2.pdf]

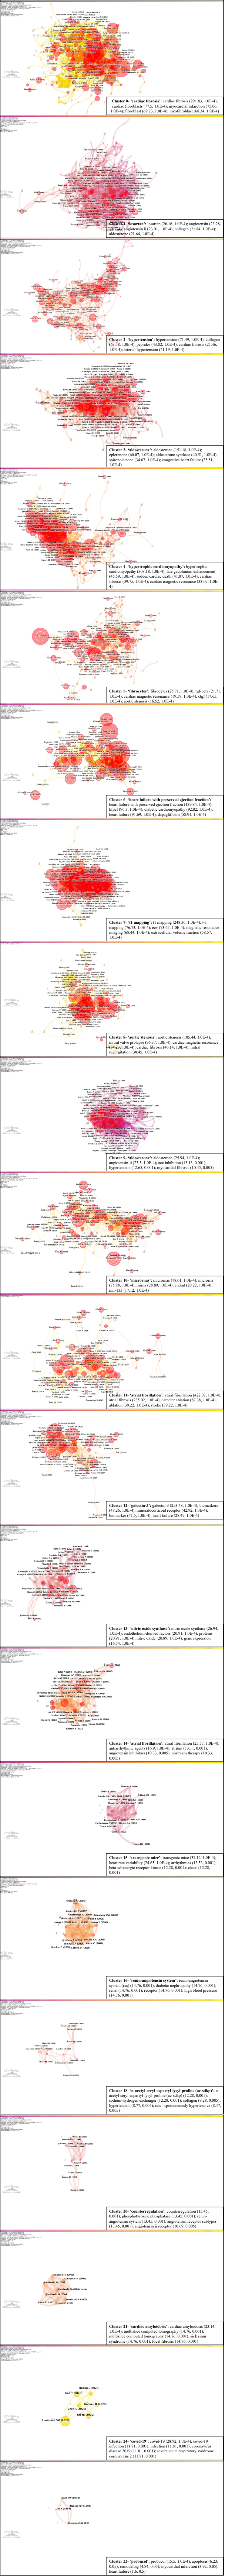

**Cluster 0 - 'cardiac fibrosis':** myocardial fibrosis (291.83, 1.0E-4); cardiac fibroblasts (77.5, 1.0E-4); cardiac fibrosis (75.06, 1.0E-4); fibroblast (69.23, 1.0E-4); myofibroblast (68.34, 1.0E-4)

**Cluster 1 - 'losartan':** losartan (26.16, 1.0E-4); angiotensin (23.28, 1.0E-4); angiotensin ii (23.01, 1.0E-4); collagen (21.84, 1.0E-4); aldosterone (21.64, 1.0E-4)

**Cluster 2 - 'hypertension':** hypertension (71.49, 1.0E-4); collagen (63.58, 1.0E-4); peptides (43.82, 1.0E-4); cardiac fibrosis (21.46, 1.0E-4); arterial hypertension (21.19, 1.0E-4)

**Cluster 3 - 'aldosterone':** aldosterone (151.18, 1.0E-4); eplerenone (60.07, 1.0E-4); aldosterone synthase (40.51, 1.0E-4); spironolactone (34.07, 1.0E-4); congestive heart failure (25.51, 1.0E-4)

**Cluster 4 - 'hypertrophic cardiomyopathy':** hypertrophic cardiomyopathy (308.18, 1.0E-4); late gadolinium enhancement (45.59, 1.0E-4); sudden cardiac death (41.87, 1.0E-4); cardiac fibrosis (39.75, 1.0E-4); cardiac magnetic resonance (33.07, 1.0E-4)

**Cluster 5 - 'fibrocytes':** fibrocytes (25.71, 1.0E-4); tgf-beta (21.71, 1.0E-4); cardiac magnetic resonance (19.59, 1.0E-4); ctgf (17.65, 1.0E-4); aortic stenosis (16.52, 1.0E-4)

**Cluster 6 - 'heart failure with preserved ejection fraction':** heart failure with preserved ejection fraction (139.84, 1.0E-4); hfpef (96.3, 1.0E-4); diabetic cardiomyopathy (92.82, 1.0E-4); heart failure (91.69, 1.0E-4); dapagliflozin (58.91, 1.0E-4)

**Cluster 7 - 't1 mapping':** t1 mapping (248.36, 1.0E-4); t-1 mapping (76.73, 1.0E-4); ecv (73.65, 1.0E-4); magnetic resonance imaging (68.44, 1.0E-4); extracellular volume fraction (58.57, 1.0E-4)

**Cluster 8 - 'aortic stenosis':** aortic stenosis (185.44, 1.0E-4); mitral valve prolapse (96.37, 1.0E-4); cardiac magnetic resonance (74.23, 1.0E-4); cardiac fibrosis (46.14, 1.0E-4); mitral regurgitation (38.45, 1.0E-4)

**Cluster 9 - 'aldosterone':** aldosterone (25.94, 1.0E-4); angiotensin-ii (23.5, 1.0E-4); ace inhibition (13.13, 0.001); hypertension (12.65, 0.001); myocardial fibrosis (10.45, 0.005)

**Cluster 10 - 'microRNAs':** microRNAs (78.01, 1.0E-4); mirna (28.89, 1.0E-4); endmt (20.22, 1.0E-4); mir-133 (17.12, 1.0E-4)

**Cluster 11 - 'atrial fibrillation':** atrial fibrillation (422.07, 1.0E-4); atrial fibrosis (235.02, 1.0E-4); catheter ablation (87.38, 1.0E-4); ablation (39.22, 1.0E-4); stroke (39.22, 1.0E-4)

**Cluster 12 - 'galectin-3':** galectin-3 (253.48, 1.0E-4); biomarkers (48.26, 1.0E-4); mineralocorticoid receptor (42.92, 1.0E-4); biomarker (41.5, 1.0E-4); heart failure (28.49, 1.0E-4)

**Cluster 13 - 'nitric oxide synthase':** nitric oxide synthase (26.94, 1.0E-4); endothelium-derived factors (20.91, 1.0E-4); proteins (20.91, 1.0E-4); nitric oxide (20.89, 1.0E-4); gene expression (16.54, 1.0E-4)

**Cluster 14 - 'atrial fibrillation':** atrial fibrillation (25.57, 1.0E-4); antiarrhythmic agents (16.33, 1.0E-4); atrium (13.11, 0.001); angiotensin inhibitors (10.99, 0.005); upstream therapy (10.33, 0.005)

**Cluster 15 - 'transgenic mice':** transgenic mice (37.12, 1.0E-4); heart rate variability (24.65, 1.0E-4); arrhythmias (13.53, 0.001); beta-adrenergic receptor kinase (12.28, 0.001); chaos (12.28, 0.001)

**Cluster 16 - 'renin-angiotensin system':** renin-angiotensin system (ras) (14.76, 0.001); diabetic nephropathy (14.76, 0.001); renin (14.76, 0.001); receptor (14.76, 0.001); high blood pressure (14.76, 0.001)

**Cluster 18 - 'n-acetyl-seryl-aspartyl-l-lysyl-proline (ac-sdhp)':** n-acetyl-seryl-aspartyl-l-lysyl-proline (12.28, 0.001); sodium-hydrogen exchanger (12.28, 0.001); collagen (9.28, 0.005); hypertension (8.77, 0.005); rats - spontaneously hypertensive (8.47, 0.005)

**Cluster 20 - 'counterregulation':** counterregulation (13.45, 0.001); phosphotyrosine phosphatase (13.45, 0.001); renin-angiotensin system (13.45, 0.001); angiotensin receptor subtypes (13.45, 0.001); angiotensin ii receptor (10.69, 0.005)

**Cluster 21 - 'cardiac amyloidosis':** cardiac amyloidosis (23.14, 1.0E-4); multislice computed tomography (14.76, 0.001); multislice computed tomography (14.76, 0.001); sick sinus syndrome (14.76, 0.001); focal fibrosis (14.76, 0.001)

**Cluster 24 - 'covid-19':** covid-19 (28.92, 1.0E-4); covid-19 infection (11.81, 0.001); infection (11.81, 0.001); coronavirus disease 2019 (11.81, 0.001); severe acute respiratory syndrome coronavirus 2 (11.81, 0.001)

**Cluster 33 - 'probumol':** probumol (15.5, 1.0E-4); apoptosis (6.23, 0.05); remodeling (4.84, 0.05); myocardial infarction (3.92, 0.05); heart failure (1.6, 0.5)
