# Supplementary material for: Trends in worldwide research on cardiac fibrosis over the period 1989–2022: a bibliometric study
Source: PubMed Central journal article supplement (PMC10277498; doi:10.3389/fcvm.2023.1182606), 2023-06-05
Supplement: Image9.pdf [file Image9.pdf]

**A**

Cumulate occurrences

1989

1991

1993

1995

1997

1999

2001

2003

2005

2007

2009

2011

2013

2015

2017

2019

2021

Year

Source

- AMERICAN JOURNAL OF PHYSIOLOGY-HEART AND CIRCULATORY PHYSIOLOGY
- CARDIOVASCULAR RESEARCH
- CIRCULATION
- FRONTIERS IN CARDIOVASCULAR MEDICINE
- HYPERTENSION
- INTERNATIONAL JOURNAL OF CARDIOLOGY
- JOURNAL OF MOLECULAR AND CELLULAR CARDIOLOGY
- JOURNAL OF THE AMERICAN COLLEGE OF CARDIOLOGY
- PLOS ONE
- SCIENTIFIC REPORTS

**B**

Cumulate occurrences

2017

2018

2019

2020

2021

2022

Year

Source

- BIOMEDICINE & PHARMACOTHERAPY
- FRONTIERS IN CARDIOVASCULAR MEDICINE
- FRONTIERS IN PHARMACOLOGY
- FRONTIERS IN PHYSIOLOGY
- INTERNATIONAL JOURNAL OF CARDIOLOGY
- INTERNATIONAL JOURNAL OF MOLECULAR SCIENCES
- JACC-CARDIOVASCULAR IMAGING
- JOURNAL OF THE AMERICAN HEART ASSOCIATION
- PLOS ONE
- SCIENTIFIC REPORTS
