# Supplementary material for: Trends in worldwide research on cardiac fibrosis over the period 1989–2022: a bibliometric study
Source: PubMed Central journal article supplement (PMC10277498; doi:10.3389/fcvm.2023.1182606), 2023-06-05

A

CiteSpace v. 5.1.R3 (64-bit) Advanced  
 October 30, 2022 at 11:24:07 PM CST  
 WoS: /Users/Allen/Desktop/cardiac\_fibrosis/data  
 Timespan: 2017-2022 (Slice Length=1)  
 Selection Criteria: q=modq (k=25), LRF=3.0, L/N=10, LBY=5, e=1.0  
 Network: N=1395, C=8601 (Density=0.0088)  
 Largest CC: 1266 (90%)  
 Nodes Labeled: 1.0%  
 Pruning: None  
 Modularity Q=0.5923  
 Weighted Mean Silhouette S=0.8029  
 Harmonic Mean(Q,S)=0.6817

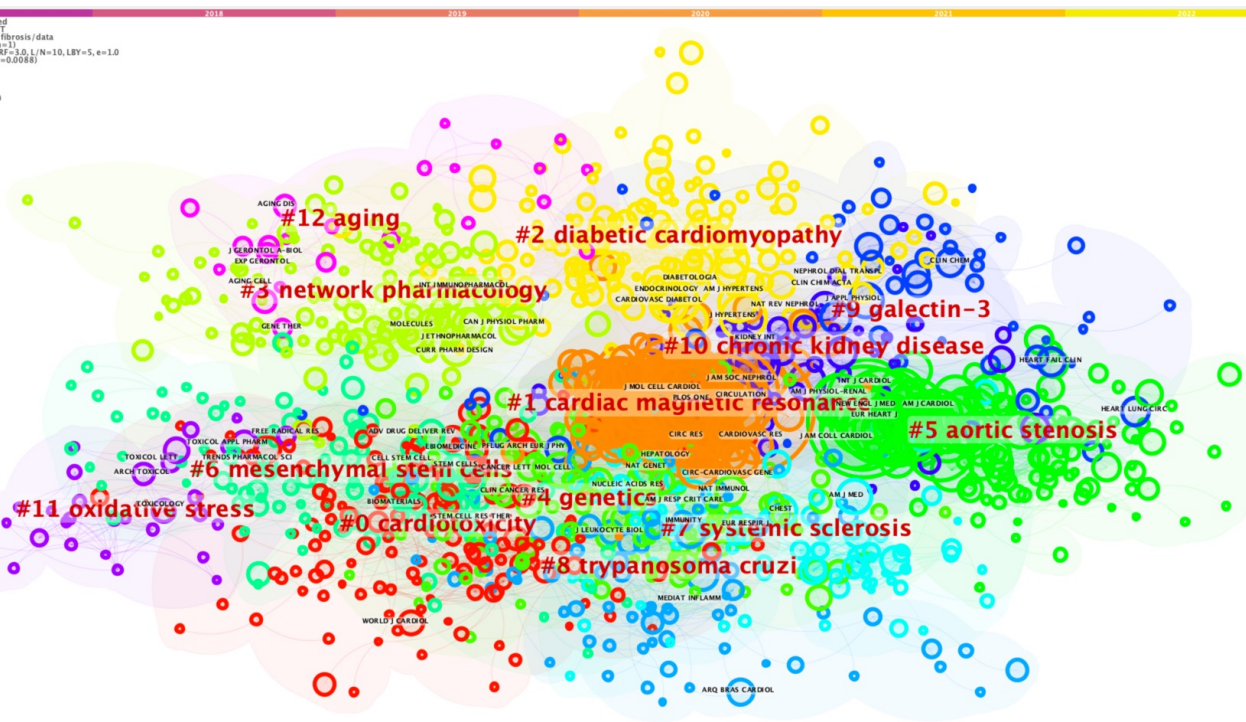

B

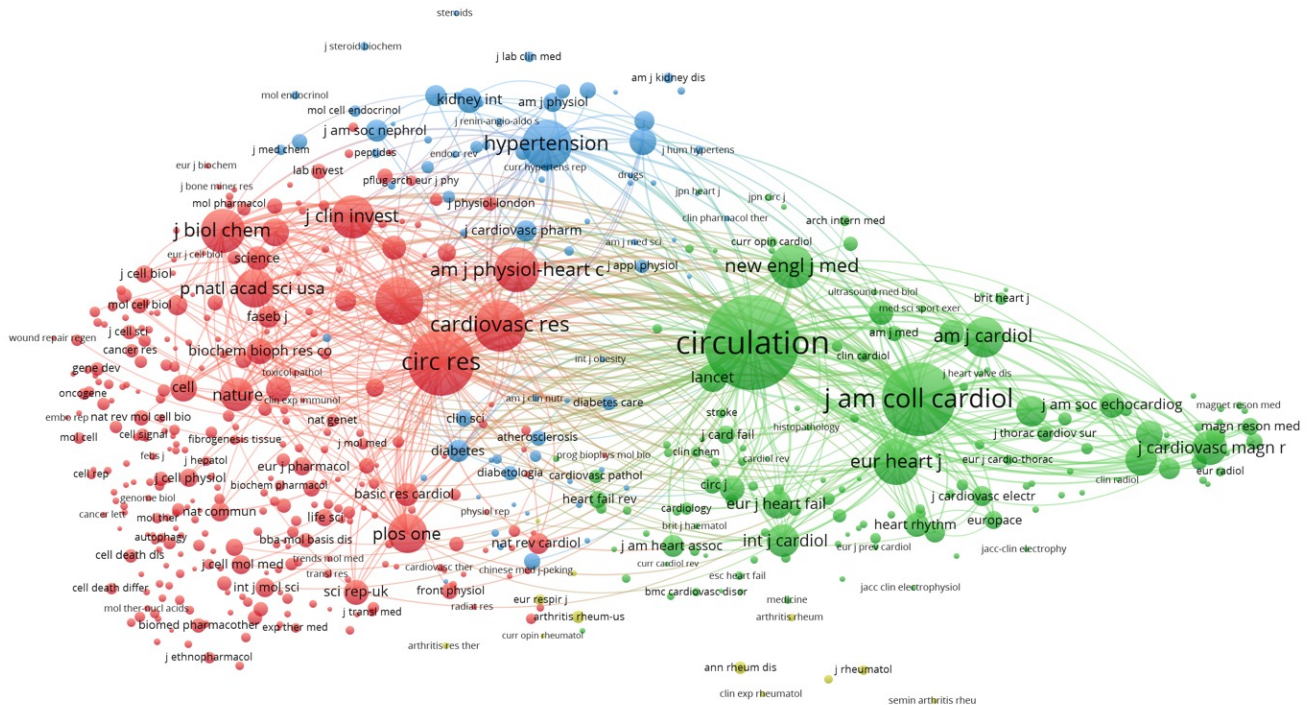

Supplement: Image10.pdf [file Image10.pdf]
