# Supplementary material for: Trends in worldwide research on cardiac fibrosis over the period 1989–2022: a bibliometric study
Source: PubMed Central journal article supplement (PMC10277498; doi:10.3389/fcvm.2023.1182606), 2023-06-05

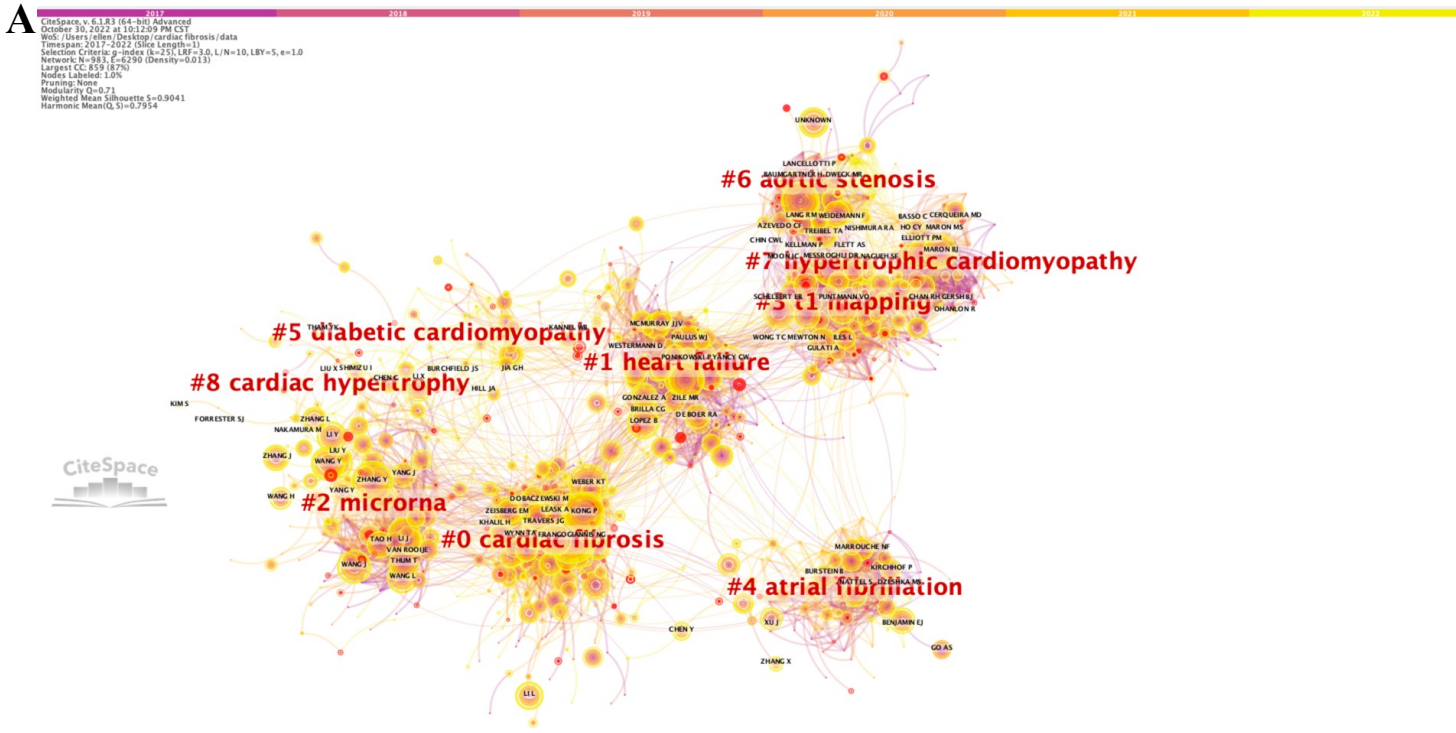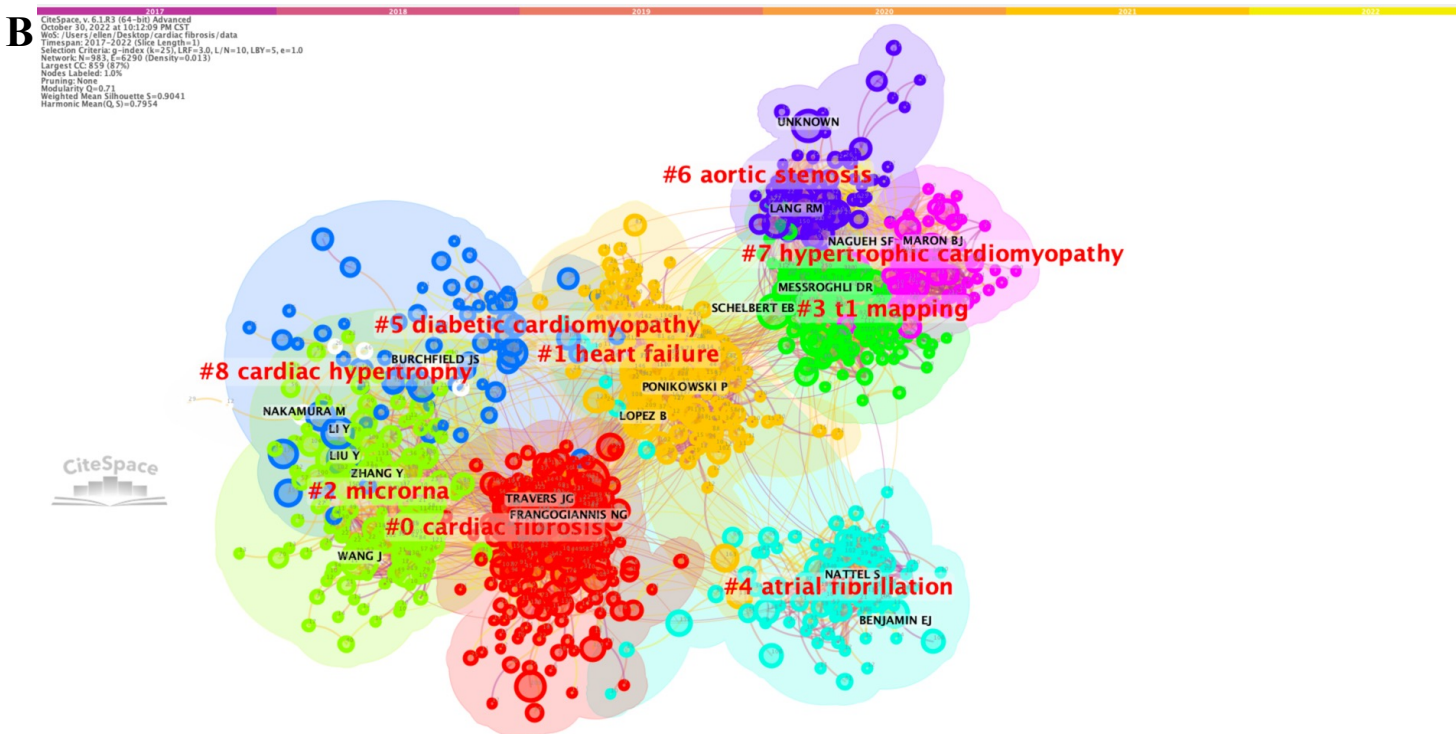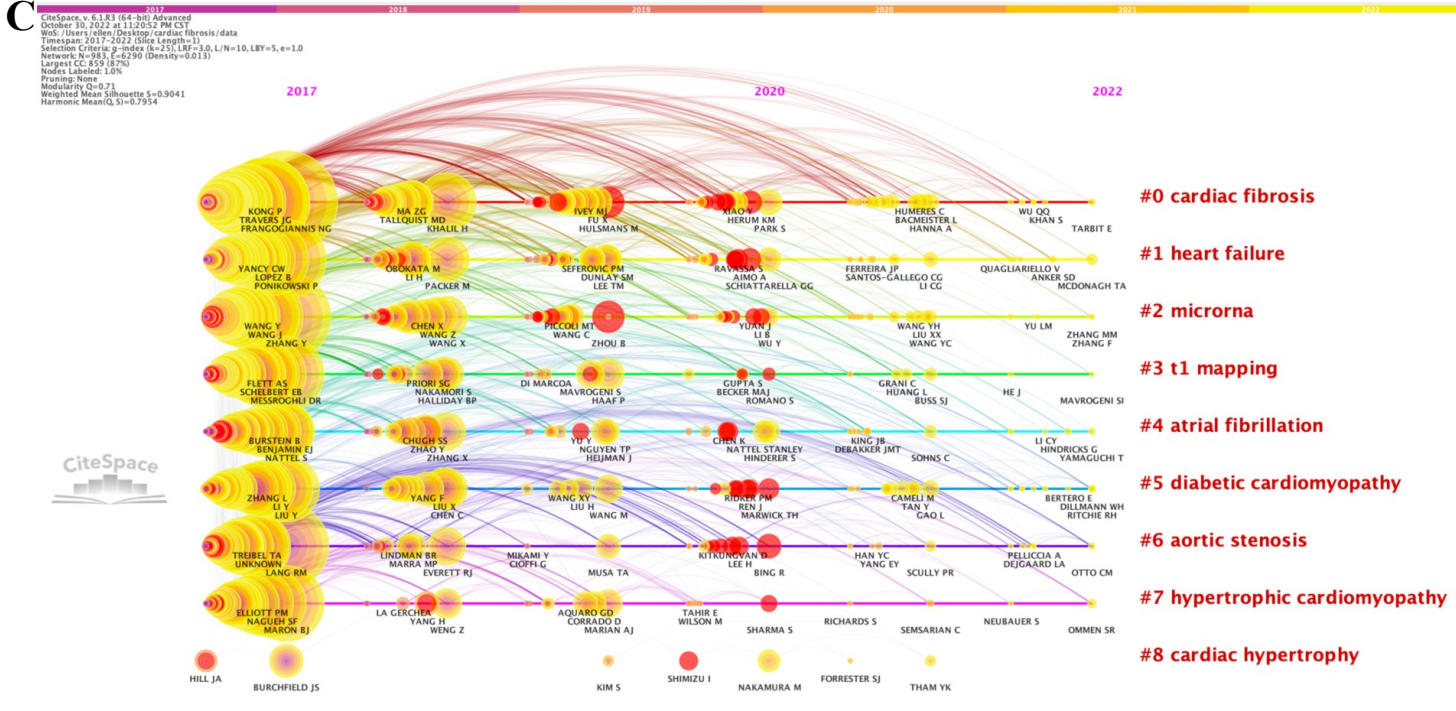

Supplement: Image12.pdf [file Image12.pdf]
