# Supplementary material for: Trends in worldwide research on cardiac fibrosis over the period 1989–2022: a bibliometric study
Source: Front Cardiovasc Med. 2023 Jun 5;10:1182606. doi: 10.3389/fcvm.2023.1182606 (PMC10277498; doi:10.3389/fcvm.2023.1182606)
Supplement: Supplementary Table S2 — Burstness analysis for countries, institutions, authors, references and keywords (1989–2022, 2017–2022 and 2022). Note: The beginning of a blue line depicts when an article is published. The beginning of a red segment marks the beginning of a period of burst, whereas the end of the red segment marks the end of the burst period. [file Table2.xlsx]

## Sheet: Sheet1
Summary of the largest clusters identified for co-citation network of references (1989-2022)
Cluster ID	Size	Silhouette score	Mean (Year)	Top five extracted terms based on keywords (Log-likelihood ratio algorithm; p-level)	Representative reference
0	350	0.926	2016	cardiac fibrosis (291.83, 1.0E-4); cardiac fibroblasts (77.5, 1.0E-4); myocardial infarction (75.06, 1.0E-4); fibroblast (69.23, 1.0E-4); myofibroblast (68.34, 1.0E-4)	BEGONA, LOPEZ (2021.0) Diffuse myocardial fibrosis: mechanisms, diagnosis and therapeutic approaches. NATURE REVIEWS CARDIOLOGY, V18, P20 DOI 10.1038/s41569-020-00504-1
1	262	0.87	1994	losartan (26.16, 1.0E-4); angiotensin (23.28, 1.0E-4); angiotensin ii (23.01, 1.0E-4); collagen (21.84, 1.0E-4); aldosterone (21.64, 1.0E-4)	P, LIJNEN (2000.0) Induction of cardiac fibrosis by aldosterone. JOURNAL OF MOLECULAR AND CELLULAR CARDIOLOGY, V32, P15 DOI 10.1006/jmcc.2000.1129
2	226	0.899	2002	hypertension (71.49, 1.0E-4); collagen (63.58, 1.0E-4); peptides (43.82, 1.0E-4); cardiac fibrosis (21.46, 1.0E-4); arterial hypertension (21.19, 1.0E-4)	PJ, LIJNEN (2003.0) Role of intracardiac renin-angiotensin-aldosterone system in extracellular matrix remodeling. METHODS AND FINDINGS IN EXPERIMENTAL AND CLINICAL PHARMACOLOGY, V25, P24 DOI 10.1358/mf.2003.25.7.778094
3	192	0.964	2001	aldosterone (151.18, 1.0E-4); eplerenone (60.07, 1.0E-4); aldosterone synthase (40.51, 1.0E-4); spironolactone (34.07, 1.0E-4); congestive heart failure (25.51, 1.0E-4)	PC, WHITE (2003.0) Aldosterone: direct effects on and production by the heart. JOURNAL OF CLINICAL ENDOCRINOLOGY & METABOLISM DOI 10.1210/jc.2003-030373
4	179	0.922	2008	hypertrophic cardiomyopathy (308.18, 1.0E-4); late gadolinium enhancement (45.59, 1.0E-4); sudden cardiac death (41.87, 1.0E-4); cardiac fibrosis (39.75, 1.0E-4); cardiac magnetic resonance (33.07, 1.0E-4)	BHARATH, AMBALE-VENKATESH (2015.0) Cardiac mri: a central prognostic tool in myocardial fibrosis. NATURE REVIEWS CARDIOLOGY, V12, P12 DOI 10.1038/nrcardio.2014.159
5	178	0.921	2007	fibrocytes (25.71, 1.0E-4); tgf-beta (21.71, 1.0E-4); cardiac magnetic resonance (19.59, 1.0E-4); ctgf (17.65, 1.0E-4); aortic stenosis (16.52, 1.0E-4)	MIKHAIL, S DZESHKA (2015.0) Cardiac fibrosis in patients with atrial fibrillation mechanisms and clinical implications. JOURNAL OF THE AMERICAN COLLEGE OF CARDIOLOGY, V66, P17 DOI 10.1016/j.jacc.2015.06.1313
6	146	0.94	2016	heart failure with preserved ejection fraction (139.84, 1.0E-4); hfpef (96.3, 1.0E-4); diabetic cardiomyopathy (92.82, 1.0E-4); heart failure (91.69, 1.0E-4); dapagliflozin (58.91, 1.0E-4)	KARL-PHILIPP, ROMMEL (2017.0) Diagnostic and prognostic value of cmr t-1-mapping in patients with heart failure and preserved ejection fraction. REVISTA ESPANOLA DE CARDIOLOGIA DOI 10.1016/j.recesp.2016.12.033
7	145	0.928	2013	t1 mapping (248.36, 1.0E-4); t-1 mapping (76.73, 1.0E-4); ecv (73.65, 1.0E-4); magnetic resonance imaging (68.44, 1.0E-4); extracellular volume fraction (58.57, 1.0E-4)	DANIEL, R MESSROGHLI (2017.0) Clinical recommendations for cardiovascular magnetic resonance mapping of t1, t2, t2*and extracellular volume: a consensus statement by the society for cardiovascular magnetic resonance (scmr) endorsed by the european association for cardiovascular imaging (eacvi). JOURNAL OF CARDIOVASCULAR MAGNETIC RESONANCE DOI 10.1186/s12968-017-0389-8
8	135	0.904	2017	aortic stenosis (185.44, 1.0E-4); mitral valve prolapse (96.37, 1.0E-4); cardiac magnetic resonance (74.23, 1.0E-4); cardiac fibrosis (46.14, 1.0E-4); mitral regurgitation (38.45, 1.0E-4)	AVI, SABBAG (2022.0) Ehra expert consensus statement on arrhythmic mitral valve prolapse and mitral annular disjunction complex in collaboration with the esc council on valvular heart disease and the european association of cardiovascular imaging endorsed cby the heart rhythm society, by the asia pacific heart rhythm society, and by the latin american heart rhythm society. EUROPACE DOI 10.1093/eu…
9	134	0.974	1989	aldosterone (25.94, 1.0E-4); angiotensin-ii (23.5, 1.0E-4); ace inhibition (13.13, 0.001); hypertension (12.65, 0.001); myocardial fibrosis (10.45, 0.005)	KT, WEBER (1993.0) Myocardial fibrosis - functional-significance and regulatory factors. CARDIOVASCULAR RESEARCH DOI 10.1093/cvr/27.3.341
10	121	0.951	2011	micrornas (78.01, 1.0E-4); microrna (75.88, 1.0E-4); mirna (28.89, 1.0E-4); endmt (20.22, 1.0E-4); mir-133 (17.12, 1.0E-4)	WINO, J WIJNEN (2013.0) The therapeutic potential of mirnas in cardiac fibrosis: where do we stand?. JOURNAL OF CARDIOVASCULAR TRANSLATIONAL RESEARCH DOI 10.1007/s12265-013-9483-y
11	94	0.959	2013	atrial fibrillation (422.07, 1.0E-4); atrial fibrosis (235.02, 1.0E-4); catheter ablation (87.38, 1.0E-4); ablation (39.22, 1.0E-4); stroke (39.22, 1.0E-4)	BENJAMIN, J HIRSH (2015.0) Fibrotic atrial cardiomyopathy, atrial fibrillation, and thromboembolism mechanistic links and clinical inferences. JOURNAL OF THE AMERICAN COLLEGE OF CARDIOLOGY, V65, P13 DOI 10.1016/j.jacc.2015.03.557
12	67	0.984	2011	galectin-3 (253.48, 1.0E-4); biomarkers (48.26, 1.0E-4); mineralocorticoid receptor (42.92, 1.0E-4); biomarker (41.5, 1.0E-4); heart failure (28.49, 1.0E-4)	RADU, I LALA (2015.0) Galectin-3 in heart failure pathology -"another brick in the wall"?. ACTA CARDIOLOGICA DOI 10.2143/AC.70.3.3080637
13	41	0.99	1997	nitric oxide synthase (26.94, 1.0E-4); endothelium-derived factors (20.91, 1.0E-4); proteins (20.91, 1.0E-4); nitric oxide (20.89, 1.0E-4); gene expression (16.54, 1.0E-4)	N, KOBAYASHI (2001.0) Effects of cilnidipine on nitric oxide and endothelin-1 expression and extracellular signal-regulated kinase in hypertensive rats. EUROPEAN JOURNAL OF PHARMACOLOGY DOI 10.1016/S0014-2999(01)01067-6
14	39	0.995	2004	atrial fibrillation (25.57, 1.0E-4); antiarrhythmic agents (16.9, 1.0E-4); atrium (13.11, 0.001); angiotensin inhibitors (10.33, 0.005); upstream therapy (10.33, 0.005)	BRETT, BURSTEIN (2008.0) Atrial fibrosis: mechanisms and clinical relevance in atrial fibrillation. JOURNAL OF THE AMERICAN COLLEGE OF CARDIOLOGY DOI 10.1016/j.jacc.2007.09.064
15	16	0.991	1993	transgenic mice (37.12, 1.0E-4); heart rate variability (24.65, 1.0E-4); arrhythmias (13.53, 0.001); beta-adrenergic receptor kinase (12.28, 0.001); chaos (12.28, 0.001)	B, SWYNGHEDAUW (1997.0) Heart rate and heart rate variability, a pharmacological target. CARDIOVASCULAR DRUGS AND THERAPY DOI 10.1007/BF00053024
16	15	1	2006	renin-angiotensin system (ras) (14.76, 0.001); diabetic nephropathy (14.76, 0.001); renal (14.76, 0.001); receptor (14.76, 0.001); high blood pressure (14.76, 0.001)	GENEVIEVE, NGUYEN (2008.0) Prorenin and (pro)renin receptor: a review of available data from in vitro studies and experimental models in rodents. EXPERIMENTAL PHYSIOLOGY DOI 10.1113/expphysiol.2007.040030
18	13	0.995	2001	n-acetyl-seryl-aspartyl-lysyl-proline (ac-sdkp) (12.28, 0.001); sodium-hydrogen exchanger (12.28, 0.001); collagen (9.28, 0.005); hypertension (8.77, 0.005); rats - spontaneously hypertensive (8.47, 0.005)	J, MONCRIEFF (2004.0) Hypertensive heart disease and fibrosis. CURRENT OPINION IN CARDIOLOGY DOI 10.1097/01.hco.0000127134.66225.97
20	10	0.996	1998	counterregulation (13.45, 0.001); phosphotyrosine phosphatase (13.45, 0.001); renin-angiotensin system (13.45, 0.001); angiotensin receptor subtypes (13.45, 0.001); angiotensin ii receptor (10.69, 0.005)	LH, OPIE (2001.0) Enhanced angiotensin ii activity in heart failure - reevaluation of the counterregulatory hypothesis of receptor subtypes. CIRCULATION RESEARCH DOI 10.1161/hh0701.089175
21	9	1	2005	cardiac amyloidosis (23.14, 1.0E-4); multislice computed tomography (14.76, 0.001); multislice computed tomography (14.76, 0.001); sick sinus syndrome (14.76, 0.001); focal fibrosis (14.76, 0.001)	HIROYA, NARUMI (2007.0) Remarkable thickening of right atrial wall in subjects with cardiac amyloidosis complicated with sick sinus syndrome. INTERNATIONAL JOURNAL OF CARDIOLOGY DOI 10.1016/j.ijcard.2006.07.103
24	6	0.999	2020	covid-19 (28.92, 1.0E-4); covid-19 infection (11.81, 0.001); infection (11.81, 0.001); coronavirus disease 2019 (11.81, 0.001); severe acute respiratory syndrome coronavirus 2 (11.81, 0.001)	EDINA, CENKO (2021.0) Cardiovascular disease and covid-19: a consensus paper from the esc working group on coronary pathophysiology & microcirculation, esc working group on thrombosis and the association for acute cardiovascular care (acvc), in collaboration with the european heart rhythm association (ehra). CARDIOVASCULAR RESEARCH, V117, P25 DOI 10.1093/cvr/cvab298
33	4	0.999	1998	probucol (15.5, 1.0E-4); apoptosis (6.23, 0.05); remodeling (4.84, 0.05); myocardial infarction (3.92, 0.05); heart failure (1.6, 0.5)	YT, SIA (2002.0) Improved post-myocardial infarction survival with probucol in rats: effects on left ventricular function, morphology, cardiac oxidative stress and cytokine expression. JOURNAL OF THE AMERICAN COLLEGE OF CARDIOLOGY DOI 10.1016/S0735-1097(01)01709-0
Summary of the largest clusters identified for co-citation network of references (2017-2022)
Cluster ID	Size	Silhouette score	Mean (Year)	Top five extracted terms based on keywords (Log-likelihood ratio algorithm; p-level)	Representative reference
0	208	0.812	2017	cardiac fibrosis (118.55, 1.0E-4); cardiac fibroblasts (48.32, 1.0E-4); fibroblast (47.44, 1.0E-4); cardiac magnetic resonance (42.27, 1.0E-4); myofibroblast (41.56, 1.0E-4)	NIKOLAOS, G FRANGOGIANNIS (2021.0) Cardiac fibrosis. CARDIOVASCULAR RESEARCH, V117, P39 DOI 10.1093/cvr/cvaa324
1	113	0.847	2016	heart failure (114.93, 1.0E-4); heart failure with preserved ejection fraction (101.62, 1.0E-4); hfpef (76.02, 1.0E-4); diastolic dysfunction (48.95, 1.0E-4); dapagliflozin (48.7, 1.0E-4)	ERIK, B SCHELBERT (2017.0) Employing extracellular volume cardiovascular magnetic resonance measures of myocardial fibrosis to foster novel therapeutics. CIRCULATION-CARDIOVASCULAR IMAGING DOI 10.1161/CIRCIMAGING.116.005619
2	94	0.884	2014	t1 mapping (131.06, 1.0E-4); extracellular volume (60.52, 1.0E-4); cardiac fibrosis (42.39, 1.0E-4); t2 mapping (27.91, 1.0E-4); t-1 mapping (26.74, 1.0E-4)	DANIEL, R MESSROGHLI (2017.0) Clinical recommendations for cardiovascular magnetic resonance mapping of t1, t2, t2*and extracellular volume: a consensus statement by the society for cardiovascular magnetic resonance (scmr) endorsed by the european association for cardiovascular imaging (eacvi). JOURNAL OF CARDIOVASCULAR MAGNETIC RESONANCE DOI 10.1186/s12968-017-0389-8
3	78	0.944	2017	cardiac fibrosis (33.93, 1.0E-4); mirna (31.73, 1.0E-4); cerna (23.61, 1.0E-4); microrna (23.27, 1.0E-4); non-coding rna (22.8, 1.0E-4)	XUPING, LI (2021.0) Epigenetics-based therapeutics for myocardial fibrosis. LIFE SCIENCES DOI 10.1016/j.lfs.2021.119186
4	73	0.947	2017	aortic stenosis (234.13, 1.0E-4); mitral valve prolapse (86.18, 1.0E-4); aortic valve replacement (44.36, 1.0E-4); aortic valve stenosis (38.04, 1.0E-4); cardiac fibrosis (35.35, 1.0E-4)	AVI, SABBAG (2022.0) Ehra expert consensus statement on arrhythmic mitral valve prolapse and mitral annular disjunction complex in collaboration with the esc council on valvular heart disease and the european association of cardiovascular imaging endorsed cby the heart rhythm society, by the asia pacific heart rhythm society, and by the latin american heart rhythm society. EUROPACE DOI 10.1093/eu…
5	60	0.894	2017	cardiac magnetic resonance (55.88, 1.0E-4); sudden cardiac death (38.72, 1.0E-4); cardiac fibrosis (33.97, 1.0E-4); dilated cardiomyopathy (29.93, 1.0E-4); ventricular tachycardia (24.91, 1.0E-4)	PIETER, VAN DER BIJL (2018.0) Sudden cardiac death risk prediction: the role of cardiac magnetic resonance' imaging. REVISTA ESPANOLA DE CARDIOLOGIA, V71, P10 DOI 10.1016/j.rec.2018.05.019
6	54	0.98	2015	atrial fibrillation (301.87, 1.0E-4); atrial fibrosis (161.68, 1.0E-4); catheter ablation (37.54, 1.0E-4); stroke (32.43, 1.0E-4); heart failure (28.73, 1.0E-4)	ANASTASIA, XINTARAKOU (2020.0) Atrial fibrosis as a dominant factor for the development of atrial fibrillation facts and gaps. EUROPACE, V22, P10 DOI 10.1093/europace/euaa009
7	54	0.929	2014	endmt (34.95, 1.0E-4); endothelial-to-mesenchymal transition (22.93, 1.0E-4); mir-29a (18.66, 1.0E-4); epigenetic (18.66, 1.0E-4); sirt1 (12.43, 0.001)	AMBRA, VESTRI (2017.0) Sphingosine 1-phosphate receptors: do they have a therapeutic potential in cardiac fibrosis?. FRONTIERS IN PHARMACOLOGY DOI 10.3389/fphar.2017.00296
8	36	0.946	2014	relaxin (25.32, 1.0E-4); myocardial infarction (18.82, 1.0E-4); cardiac magnetic resonance (16.97, 1.0E-4); serelaxin (15.18, 1.0E-4); cardiac fibrosis (14.36, 0.001)	TONG, LIU (2017.0) Current understanding of the pathophysiology of myocardial fibrosis and its quantitative assessment in heart failure. FRONTIERS IN PHYSIOLOGY DOI 10.3389/fphys.2017.00238
9	29	0.966	2017	diabetic cardiomyopathy (175.32, 1.0E-4); diabetes (42.8, 1.0E-4); oxidative stress (32.27, 1.0E-4); diabetes mellitus (25.36, 1.0E-4); diabetic cardiomyopathy (22.35, 1.0E-4)	IZABELA, TULETA (2021.0) Fibrosis of the diabetic heart: clinical significance, molecular mechanisms, and therapeutic opportunities. ADVANCED DRUG DELIVERY REVIEWS DOI 10.1016/j.addr.2021.113904
10	25	0.962	2015	hypertrophic cardiomyopathy (168.37, 1.0E-4); hypertrophic cardiomyopathy (45.14, 1.0E-4); sudden cardiac death (30.94, 1.0E-4); late gadolinium enhancement (19.14, 1.0E-4); cardiac magnetic resonance (18.79, 1.0E-4)	CORDULA, MARIA WOLF (2019.0) Hypertrophic cardiomyopathy: genetics and clinical perspectives. CARDIOVASCULAR DIAGNOSIS AND THERAPY DOI 10.21037/cdt.2019.02.01
11	19	0.984	2013	galectin-3 (101.13, 1.0E-4); cardiotrophin-1 (16.45, 1.0E-4); biomarker (11.66, 0.001); cardiac fibrosis (9.21, 0.005); prognostic value (8.21, 0.005)	SILVIA, MASOTTI (2017.0) Markers of cardiac remodeling and fibrosis. BIOCHIMICA CLINICA, V41, P16 DOI 10.19186/BC_2017.002
12	6	0.999	2020	covid-19 (33.41, 1.0E-4); covid-19 infection (11.06, 0.001); infection (11.06, 0.001); coronavirus disease 2019 (11.06, 0.001); severe acute respiratory syndrome coronavirus 2 (11.06, 0.001)	EDINA, CENKO (2021.0) Cardiovascular disease and covid-19: a consensus paper from the esc working group on coronary pathophysiology & microcirculation, esc working group on thrombosis and the association for acute cardiovascular care (acvc), in collaboration with the european heart rhythm association (ehra). CARDIOVASCULAR RESEARCH, V117, P25 DOI 10.1093/cvr/cvab298
Summary of the largest clusters identified for co-citation network of references (2022)
Cluster ID	Size	Silhouette score	Mean (Year)	Top five extracted terms based on keywords (Log-likelihood ratio algorithm; p-level)	Representative reference
0	71	0.715	2018	myofibroblast (6.25, 0.05); myocardial infarction (4.8, 0.05); cardiac fibrosis (3.93, 0.05); tgf-beta (3.46, 0.1); oncology (3.44, 0.1)	KAZUAKI, MARUYAMA (2022.67) The pathogenesis of cardiac fibrosis: a review of recent progress. INTERNATIONAL JOURNAL OF MOLECULAR SCIENCES DOI 10.3390/ijms23052617
1	46	0.887	2018	atrial substrate (5.04, 0.05); bufalin (5.04, 0.05); cell mechanics (5.04, 0.05); catheter ablation (5.04, 0.05); coronary blood flow (5.04, 0.05)	PEDRO, SILVA CUNHA (2022.5) The atrium in atrial fibrillation - a clinical review on how to manage atrial fibrotic substrates. FRONTIERS IN CARDIOVASCULAR MEDICINE DOI 10.3389/fcvm.2022.879984
2	46	0.877	2019	leukocyte (8.78, 0.005); fibroblast (6.94, 0.01); integrin (5.2, 0.05); extracellular matrix (4.37, 0.05); barthel index (4.37, 0.05)	WILLEM, B VAN HAM (2022.58) Clinical phenotypes of heart failure with preserved ejection fraction to select preclinical animal models. JACC-BASIC TO TRANSLATIONAL SCIENCE DOI 10.1016/j.jacbts.2021.12.009
3	46	0.901	2019	diabetic cardiomyopathy (15.94, 1.0E-4); sglt2 inhibitor (8.36, 0.005); oxidative stress (8.02, 0.005); cardiac fibrosis (5.16, 0.05); diabetes mellitus (4.8, 0.05)	SEUL-GEE, LEE (2022.67) Dapagliflozin attenuates diabetes-induced diastolic dysfunction and cardiac fibrosis by regulating sgk1 signaling. BMC MEDICINE DOI 10.1186/s12916-022-02485-z
4	43	0.938	2018	mitral valve prolapse (14.04, 0.001); cardiovascular magnetic resonance (7.7, 0.01); echocardiography (7.7, 0.01); cardiac imaging (4.64, 0.05); transcatheter aortic valve replacement (4.64, 0.05)	ALI, ALENAZY (2022.58) Diagnosis of mitral valve prolapse: much more than simple prolapse. multimodality approach to risk stratification and therapeutic management. JOURNAL OF CLINICAL MEDICINE DOI 10.3390/jcm11020455
5	35	0.935	1990	car-t cells (5.98, 0.05); mechanism (5.98, 0.05); organ fibrosis (5.98, 0.05); preclinical evidence (5.98, 0.05); nf -kb (5.98, 0.05)	PAOLO, MORFINO (2022.75) Treatment of cardiac fibrosis: from neuro-hormonal inhibitors to car-t cell therapy. HEART FAILURE REVIEWS DOI 10.1007/s10741-022-10279-x
6	33	0.92	2018	systems biology (5.13, 0.05); rat (5.13, 0.05); mineralocorticoid (5.13, 0.05); cardiac dysfunction (5.13, 0.05); mechanosensitive ion channel (5.13, 0.05)	QING, ZHANG (2022.17) Signaling pathways and targeted therapy for myocardial infarction. SIGNAL TRANSDUCTION AND TARGETED THERAPY DOI 10.1038/s41392-022-00925-z
7	27	0.934	2019	cardiac magnetic resonance (6.15, 0.05); extracellular volume fraction (4.87, 0.05); molecular imaging (4.87, 0.05); metabolomics (4.87, 0.05); adolescents (4.87, 0.05)	LEYI, ZHU (2022.67) Detection of myocardial fibrosis: where we stand. FRONTIERS IN CARDIOVASCULAR MEDICINE DOI 10.3389/fcvm.2022.926378
9	24	0.878	2019	apoptosis (9.55, 0.005); s100a9 (4.76, 0.05); picp (4.76, 0.05); s100a8 (4.76, 0.05); micrornas (4.76, 0.05)	KAMILA, RAZIYEVA (2022.0) Novel therapies for the treatment of cardiac fibrosis following myocardial infarction. BIOMEDICINES DOI 10.3390/biomedicines10092178
10	18	0.957	2018	vascular endothelial function (5.6, 0.05); t1 (5.6, 0.05); cardiac (5.6, 0.05); sudden (5.6, 0.05); rare (5.6, 0.05)	MANXIA, SU (2022.33) Skimmin ameliorates cardiac function via the regulation of m2 macrophages in a myocardial infarction mouse model. PERFUSION-UK DOI 10.1177/02676591221100742
11	6	0.993	2019	mitogen-activated protein kinase kinase kinase 3 (8.4, 0.005); microrna-145 (8.4, 0.005); pvt1 (8.4, 0.005); hcn1 (8.4, 0.005); creb1 (8.4, 0.005)	YUN, LIU (2022.25) Mircrorna-145 attenuates cardiac fibrosis via regulating mitogen-activated protein kinase kinase kinase 3. CARDIOVASCULAR DRUGS AND THERAPY DOI 10.1007/s10557-021-07312-w
12	6	0.988	2020	systems biology (NaN, 1.0); extracellular matrix (NaN, 1.0); extracellular volume fraction (NaN, 1.0); atrial substrate (NaN, 1.0); krill oil (NaN, 1.0)	TIANTIAN, MENG (2022.83) Global research trends on ventricular remodeling: a bibliometric analysis from 2012 to 2022. CURRENT PROBLEMS IN CARDIOLOGY DOI 10.1016/j.cpcardiol.2022.101332
17	3	1	2019	nrg-1 (8.65, 0.005); trastuzumab (8.65, 0.005); cardiac toxicity (8.65, 0.005); stem cells (8.65, 0.005); akt (8.65, 0.005)	NESRINE, EBRAHIM (2022.92) Prophylactic evidence of mscs-derived exosomes in doxorubicin/trastuzumab-induced cardiotoxicity: beyond mechanistic target of nrg-1/erb signaling pathway. INTERNATIONAL JOURNAL OF MOLECULAR SCIENCES DOI 10.3390/ijms23115967
